# Supplementary material
Source: publisher figshare collection journal article supplement (https://acs.figshare.com/ndownloader/files/4580197)
Supplement: Supplementary file 1 [file 4580197]

SUPPLEMENTARY MATERIALS

**Table S1.** Details of MD trajectories discussed in the articles

| Systems <sup>a</sup>                                                                 | Length of MD, ns <sup>b</sup> | Abbreviations <sup>c</sup> | Comments                                                                                                         |
|--------------------------------------------------------------------------------------|-------------------------------|----------------------------|------------------------------------------------------------------------------------------------------------------|
| DOPS <sub>128</sub> / water <sub>5624</sub> / Na <sup>+</sup> <sub>128</sub>         | 15                            | <i>PS-pure</i>             | The average A <sub>L</sub> value is 63.3 Å <sup>2</sup>                                                          |
| DOPC <sub>128</sub> / water <sub>4821</sub>                                          | 20                            | <i>PC-pure</i>             | The average A <sub>L</sub> value is 70.2 Å <sup>2</sup>                                                          |
| pAntp / DOPS <sub>128</sub> / water <sub>5065</sub> / Na <sup>+</sup> <sub>121</sub> | 24                            | <i>PS-run1</i>             | Non-polar residues of pAntp is oriented towards the membrane, basic and aromatic residues facing the water phase |
| pAntp / DOPS <sub>128</sub> / water <sub>5065</sub> / Na <sup>+</sup> <sub>121</sub> | 24                            | <i>PS-run2</i>             | Basic and aromatic residues of pAntp oriented towards the membrane, non-polar residues facing the water phase    |
| pAntp / DOPC <sub>128</sub> / water <sub>7060</sub> / Cl <sup>-</sup> <sub>7</sub>   | 24                            | <i>PC-run1</i>             | -/-                                                                                                              |
| pAntp / DOPC <sub>128</sub> / water <sub>7060</sub> / Cl <sup>-</sup> <sub>7</sub>   | 24                            | <i>PC-run2</i>             | -/-                                                                                                              |

<sup>a</sup> pAntp, penetratin (sequence, **RQIKIWFQNRRMKWKK** – basic residues are given with bold characters, non-polar and aromatic ones are underlined); subscripts correspond to the number of lipid or water molecules, and Na<sup>+</sup> or Cl<sup>-</sup> counterions in the system.

<sup>b</sup> All MD trajectories were recorded with 0.002 ns separation time between system snapshots

<sup>c</sup> MD simulations of PS/PC-pure and PS/PC-run1/2 systems were carried out as described in Polyansky, A. A. et al., *J. Phys. Chem. B* **2005**, *109*, 15052-15059 and the first article of this series.

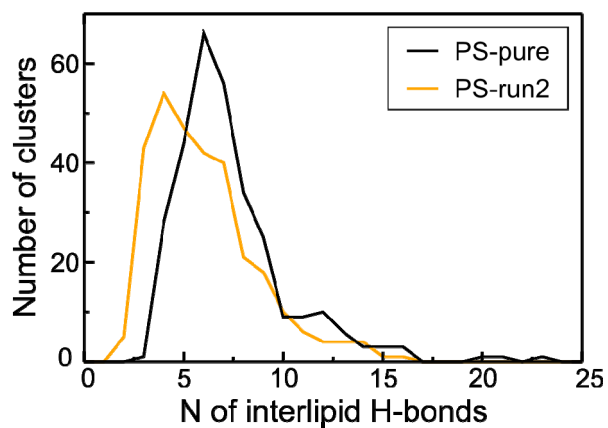

**Figure S1.** Histograms of H-bond cluster sizes (numbers of interlipid H-bonds) on the interface of “pure” DOPS bilayer and with the presence of pAntp. Statistics for the last 1 ns of MD is given. Delineation of H-bond clusters was carried out with the similar approach as for hydrophobic ones (*see Methods*). For the peptide-bilayer complex the data are shown only for the neighboring leaflet.
